# Supplementary material for: Concurrent transcriptional profiling of Dirofilaria immitis and its Wolbachia endosymbiont throughout the nematode life cycle reveals coordinated gene expression
Source: PubMed Central journal article supplement (PMC4289336; doi:10.1186/1471-2164-15-1041), 2014-11-29

**A**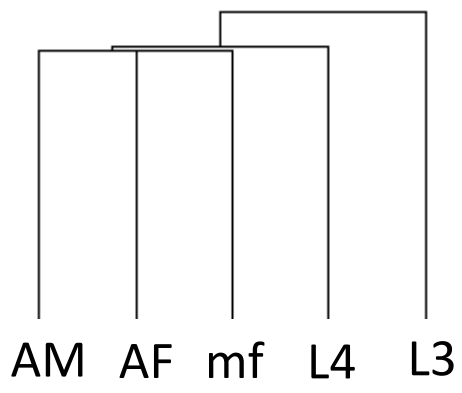**B**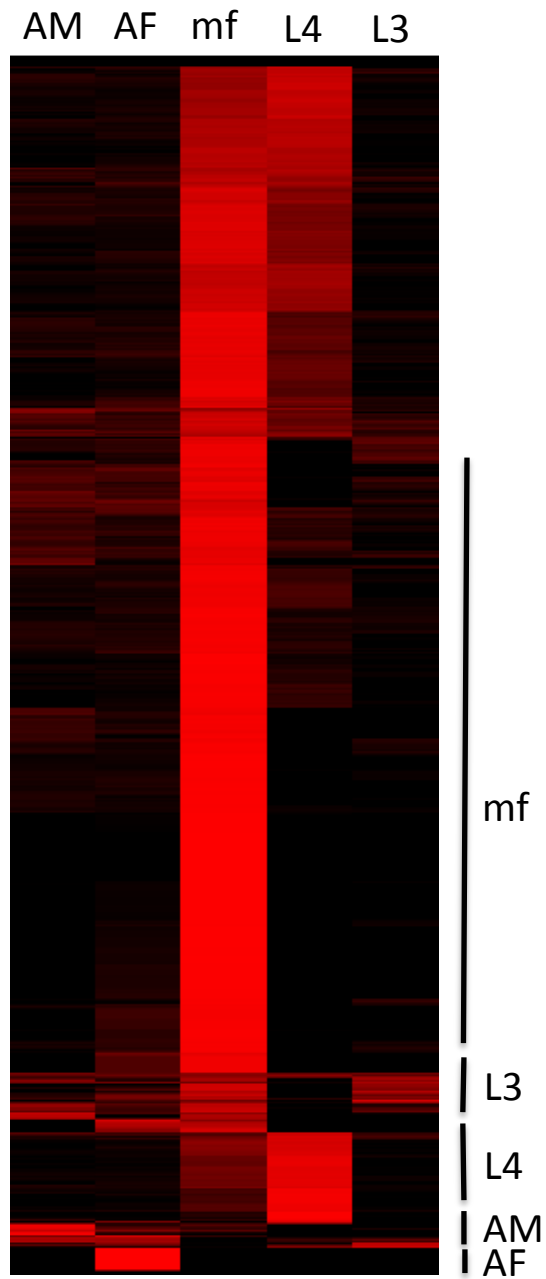

Supplement: 12864_2014_6864_MOESM11_ESM.pdf [file 12864_2014_6864_MOESM11_ESM.pdf]
